# Supplementary material for: One-pot synthesized Cu/Au/Pt trimetallic nanoparticles with enhanced catalytic and plasmonic properties as a universal platform for biosensing and cancer theranostics
Source: Royal Society of Chemistry journal article supplement (doi:10.1039/c8cc10127b), 2019-01-01
Supplement: c8cc10127b1.pdf [file c8cc10127b1.pdf]

## Electronic Supplementary Information (ESI)

### **One-pot synthesized Cu/Au/Pt trimetallic nanoparticles with enhanced catalytic and plasmonic properties as a universal platform for biosensing and cancer theranostics**

Xiaosheng Ye,<sup>a,b</sup> Xiaoxiao He,<sup>a</sup> Yanli Lei,<sup>a</sup> Jinlu Tang,<sup>a</sup> Yanru Yu,<sup>a</sup> Hui Shi,<sup>\*,a</sup> and Kemin Wang<sup>\*,a</sup>

<sup>a</sup> State Key Laboratory of Chemo/Biosensing and Chemometrics, College of Chemistry and Chemical Engineering, College of Biology, Hunan University, Key Laboratory for Bio-Nanotechnology and Molecular Engineering of Hunan Province, Changsha 410082, Hunan, China.

<sup>b</sup> Xiangya School of Public Health, Central South University, Changsha 410078, Hunan, China.

\* Corresponding authors. Email: kmwang@hnu.edu.cn; huishi\_2009@hnu.edu.cn.

### **Contents**

|                            |      |
|----------------------------|------|
| Experimental Section ..... | S-2  |
| Supporting Figures .....   | S-5  |
| Supporting Table .....     | S-18 |
| References.....            | S-19 |

## Experimental Section

**Materials and Chemicals.** DNA probes were custom-designed and synthesized by Sangon Biotech Co., Ltd. The sequence of 3'-thiol aptamer Sgc8c (Sgc8c-SH) is 5'-ATC TAA CTG CTG CGC CGC CGG GAA AAT ACT GTA CGG TTA GA-SH-3'. The sequence of 3'-thiol DNA library (Lib-SH) is 5'-(NNN)<sub>13</sub>NN-SH-3'. Glucose oxidase (GOD, from *Aspergillus niger*), K<sub>2</sub>PtCl<sub>4</sub> (>99.9%), Calcein-AM, Propidium iodide (PI), sodium citrate and Bovine serum albumin (BSA) were purchased from Sigma-Aldrich Chemicals. HAuCl<sub>4</sub>·H<sub>2</sub>O (>99.5%), CuSO<sub>4</sub>·5H<sub>2</sub>O, 3,3',5,5'-tetramethylbenzidine (TMB) and NaBH<sub>4</sub> were gained from Ding Guo Biotech Co., Ltd. (Beijing, China). Glucose, R-lactose, D-fructose and maltose were obtained from Aladdin Industrial Inc. (Shanghai, China). Yeast tRNA was purchased from Sinopharm Chemical Reagent Co., Ltd. (Shanghai, China). Binding buffer was prepared by mixing 0.1 mg/mL yeast tRNA and 1 mg/mL BSA with the D-PBS solution containing 5 mM MgCl<sub>2</sub> and 4.5 g/L glucose.

**Preparation and functionalization of Cu/Au/Pt TMNPs.** Generally, CuSO<sub>4</sub> solution (0.36 mM) was added with 25  $\mu$ L of sodium citrate (0.1 M) and 10 mL of water. Afterward, the system was rapidly mixed with 500  $\mu$ L of freshly prepared NaBH<sub>4</sub> solution (1.9 mg in 2 mL of H<sub>2</sub>O). About 15 min later, the mixed solution was added with the mixture of HAuCl<sub>4</sub> (0.24 mM) and K<sub>2</sub>PtCl<sub>4</sub> (0.24 mM) and continuously stirred for 20 minutes. Finally, the ultimate Cu/Au/Pt TMNPs was kept at 25 °C for storage and further application. Specified for condition optimization experiments, Cu/Au/Pt TMNPs were prepared with various concentrations of CuSO<sub>4</sub> and HAuCl<sub>4</sub>.

To obtain cancer targeting function, aptamers were assembled on the surface of Cu/Au/Pt TMNPs by the “Au-S” interaction. Cu/Au/Pt TMNPs were mixed with 1  $\mu$ M thiolated DNA probes and 1  $\mu$ M BSA, and incubated for 12 h. Then, DNA-modified Cu/Au/Pt TMNPs were purified through centrifugation at 12,000 rpm for 5 min.

**Characterization of Cu/Au/Pt TMNPs.** UV-vis spectrum analysis was performed using a Beckman Counter DU800 spectrophotometer. High Response Transmission Electron Microscopy (HRTEM) was carried out on a JEOL-3010 microscope working at a 200 kV accelerating voltage. All of the TEM samples were prepared by depositing on carbon-covered copper grids and then dried overnight before determination. The elements of the TMNPs were analyzed using energy-dispersive spectroscopy (EDS, Titan G2 60-300) at a 300 kV accelerating voltage through depositing nanoparticles solution on Mo-

supported film. Size distribution of the TMNPs was analyzed by dynamic light scattering (DLS, Malvern Zetasizer 3000 HS).

Heating ability of Cu/Au/Pt TMNPs was determined using a 780 nm laser as the irradiation source at 0.54 W/cm<sup>2</sup> for 5 min. Catalytic activity of Cu/Au/Pt TMNPs was tested as follows: 50  $\mu$ L of native Cu/Au/Pt TMNPs solution was mixed with 25  $\mu$ L of H<sub>2</sub>O<sub>2</sub> (0.5 mM), 50  $\mu$ L of H<sub>2</sub>SO<sub>4</sub> (0.5 M), 50  $\mu$ L of TMB (1.7  $\mu$ M) and 75  $\mu$ L of H<sub>2</sub>O, and then incubated for 10 min in a 45 °C water bath. Subsequently, the absorbance at 450 nm of TMB<sup>+</sup> was recorded by a multifunctional micro-plate reader (Infinite M1000) through adding 150  $\mu$ L of the final reaction solution into a 96-well plate.

**Detection of H<sub>2</sub>O<sub>2</sub> and glucose based on Cu/Au/Pt TMNPs with high catalytic activity.** For H<sub>2</sub>O<sub>2</sub> detection: 50  $\mu$ L of Cu/Au/Pt TMNPs (0.05 mg mL<sup>-1</sup>), 50  $\mu$ L of H<sub>2</sub>SO<sub>4</sub> (0.05 M) and 50  $\mu$ L of TMB (1.7  $\mu$ M) were added with 100  $\mu$ L of various concentrations of H<sub>2</sub>O<sub>2</sub>, and then incubated for 10 min in a 55 °C water bath. Subsequently, photographs were immediately taken, and the spectra or the absorbance at 450 nm were recorded by a multifunctional micro-plate reader (Infinite M1000) through adding 150  $\mu$ L of the final reaction solution into a 96-well plate.

For glucose sensing: 45  $\mu$ L of glucose with different concentrations in 10 mM phosphate buffer solution (pH 7.4) was mixed with 5  $\mu$ L of 5.0 mg/mL GOD, and then incubated for 15 min in a 37 °C water bath. Next, 50  $\mu$ L of Cu/Au/Pt TMNPs (0.05 mg mL<sup>-1</sup>), 50  $\mu$ L of H<sub>2</sub>SO<sub>4</sub> (0.05 M), 50  $\mu$ L of TMB (1.7  $\mu$ M) and 50  $\mu$ L of H<sub>2</sub>O solution were added to the above reaction solution. After incubation for 10 min at 55 °C, the absorbance at 450 nm of TMB<sup>+</sup> was recorded by a multifunctional micro-plate reader (Infinite M1000) through adding 150  $\mu$ L of the final reaction solution into a 96-well plate.

**Cells.** Ramos cells (CRL-1596, B lymphocyte, human Burkitt's lymphoma) and CCRF-CEM cells (CCL-119, T lymphoblast, human acute lymphoblastic leukemia) were acquired from the Cell Lab of our Experiment Center. All of the cells were incubated in the medium of RPMI 1640 containing 100 IU/mL streptomycin-penicillin and 12% FBS, cultured in a moistened incubator with 5% weight/volume CO<sub>2</sub> at 37 °C. The concentration of cells was monitored by a hemocytometer.

**Colorimetric analysis of cancer cells with Sgc8c-Cu/Au/Pt TMNPs.** Generally, Sgc8c-Cu/Au/Pt TMNPs (2 mg/mL) was added into 50  $\mu$ L of the suspension of CCRF-CEM cells dispersed in binding buffer, and incubated for an hour at 37 °C. Then the mixed solution was centrifuged for 5 min at 1,500 rpm to get rid of the Sgc8c-Cu/Au/Pt TMNPs unbound to cells. Next, the cells binding with Sgc8c-

Cu/Au/Pt TMNPs were added with the detection solution containing 25  $\mu\text{L}$  of  $\text{H}_2\text{O}_2$  (1 mM), 50  $\mu\text{L}$  of  $\text{H}_2\text{SO}_4$  (0.05 M), 50  $\mu\text{L}$  of TMB (1.7  $\mu\text{M}$ ) and 125  $\mu\text{L}$  of  $\text{H}_2\text{O}$ , and incubated for 10 min at 55  $^\circ\text{C}$ . Finally, the absorbance at 450 nm of  $\text{TMB}^+$  was recorded by a multifunctional micro-plate reader (Infinite M1000) through adding 150  $\mu\text{L}$  of the final reaction solution into a 96-well plate.

Specified in the feasibility investigation, 5,000 cells were used. Ramos cells were used as the control cells and Lib-Cu/Au/Pt TMNPs were used as the control probes. The detected cell numbers for quantitative analyzing of target cells were listed as follows: 0, 200, 500, 1,000, 2,500, 5,000, 6,000, 8,000 and 10,000 cells.

**Selective photothermal ablation of cancer cells using Sgc8c-Cu/Au/Pt TMNPs.** 50  $\mu\text{L}$  of Ramos or CCRF-CEM cells suspension ( $10^5$  cells) was incubated with Cu/Au/Pt TMNPs, Sgc8c-Cu/Au/Pt TMNPs or Lib-Cu/Au/Pt TMNPs (2 mg/mL) for 60 min at 37  $^\circ\text{C}$ , and then centrifuged for 5 min at 1500 rpm to remove nanoparticles unbound to cells. After re-dispersing in binding buffer, cells suspension was added into 96-well cell culture plates for 5 min irradiation at 0.54  $\text{W}/\text{cm}^2$  by a 780 nm laser. The viability of cells was carried out by flow cytometry analysis through staining cells with 5.5  $\mu\text{M}$  PI for half an hour at 37  $^\circ\text{C}$ . Moreover, As an alternative, co-stained assay was performed by incubating cells with 5.5  $\mu\text{M}$  PI and 5.5  $\mu\text{M}$  calcein-AM for half an hour at 37  $^\circ\text{C}$ . And then the stained cells were imaged on an inverted microscope (Nikon, Te300).

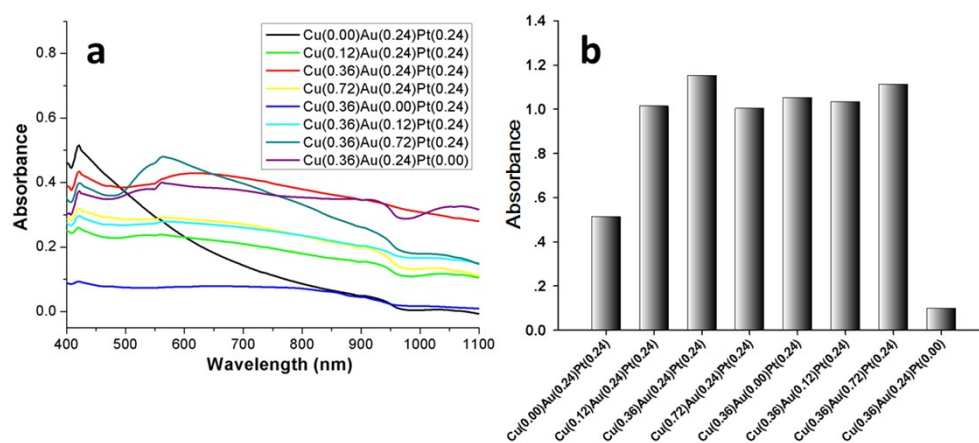

**Fig. S1** Comparison of the plasmonic and catalytic properties of Cu/Au/Pt TMNPs that were prepared with different concentrations (mM) of CuSO<sub>4</sub>, HAuCl<sub>4</sub> and K<sub>2</sub>PtCl<sub>4</sub>. (a) Absorption spectra of metallic nanoparticles. (b) Background-subtracted absorbance at 450 nm of the TMB-H<sub>2</sub>O<sub>2</sub> reaction system catalyzed by metallic nanoparticles.

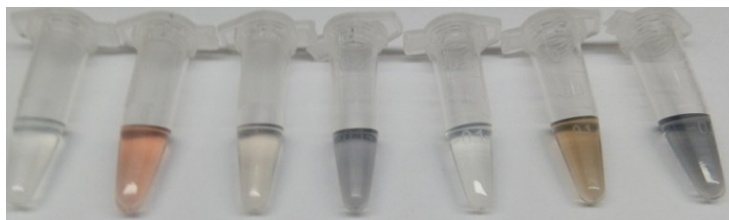

**Fig. S2** A photograph of different metallic nanoparticle samples in an aqueous solution under ambient light. (From left to right: Cu nanoparticles, Au nanoparticles, Pt nanoparticles, Cu/Au bimetallic nanoparticles, Cu/Pt bimetallic nanoparticles, Au/Pt bimetallic nanoparticles and Cu/Au/Pt TMNPs).

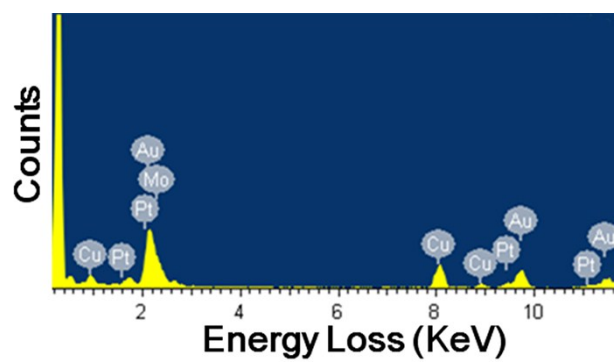

**Fig. S3** EDS characterization result of Cu/Au/Pt TMNPs.

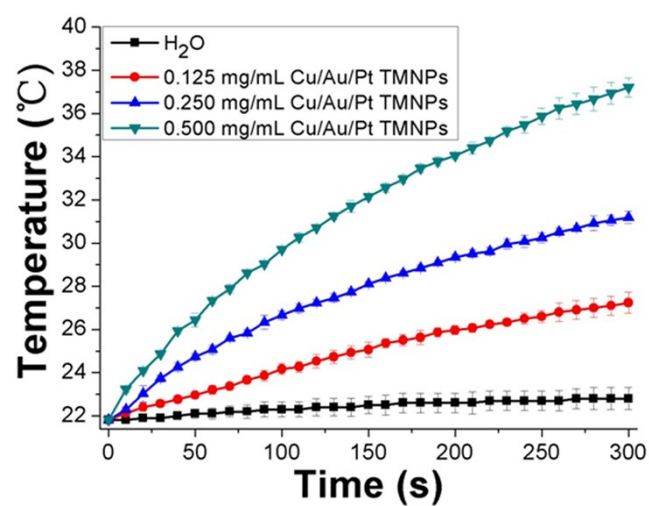

**Fig. S4** Heating curves of water and Cu/Au/Pt TMNPs solutions with different concentrations under 780 nm laser irradiation.



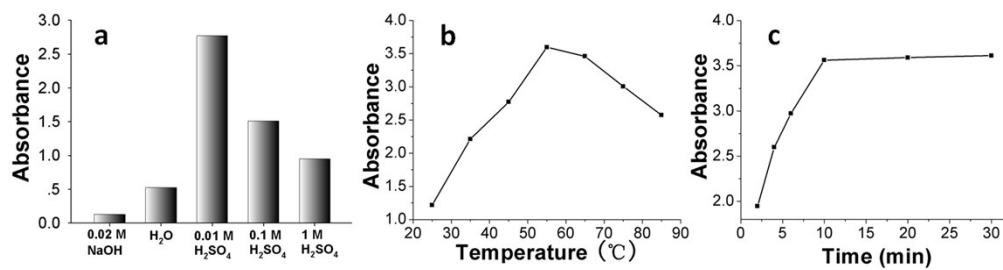

**Fig. S5** Optimization of parameters affecting the catalysis of Cu/Au/Pt TMNPs on the TMB-H<sub>2</sub>O<sub>2</sub> reaction system. (a) pH; (b) reaction temperature; (c) reaction time.

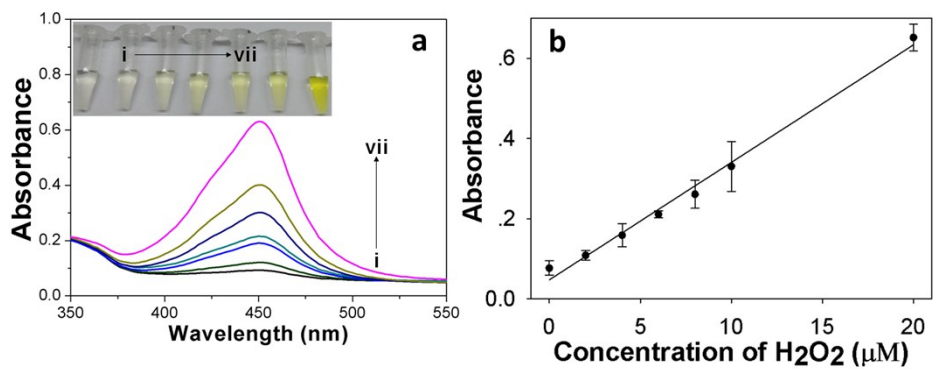

**Fig. S6** The dependence of colorimetric signal on the concentration of  $\text{H}_2\text{O}_2$  based on Cu/Au/Pt TMNPs-mediated TMB- $\text{H}_2\text{O}_2$  reaction. (a) Photographs and UV-vis absorption spectra of TMB- $\text{H}_2\text{O}_2$  reaction samples with different concentrations of  $\text{H}_2\text{O}_2$ , catalysed by Cu/Au/Pt TMNPs (from i to viii: 0, 2, 4, 6, 8, 10, and 20  $\mu\text{M}$ ). (b) The relationship between the absorbance at 450 nm and the concentration of  $\text{H}_2\text{O}_2$ .

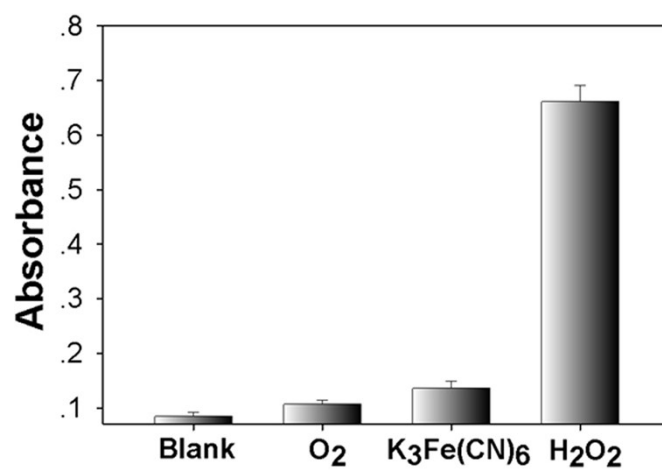

**Fig. S7** Selectivity determination of H<sub>2</sub>O<sub>2</sub> based on Cu/Au/Pt TMNPs-mediated TMB-H<sub>2</sub>O<sub>2</sub> reaction, by using 200  $\mu$ M K<sub>3</sub>Fe(CN)<sub>6</sub> and dissolved O<sub>2</sub> as controls (H<sub>2</sub>O<sub>2</sub>: 20  $\mu$ M ).

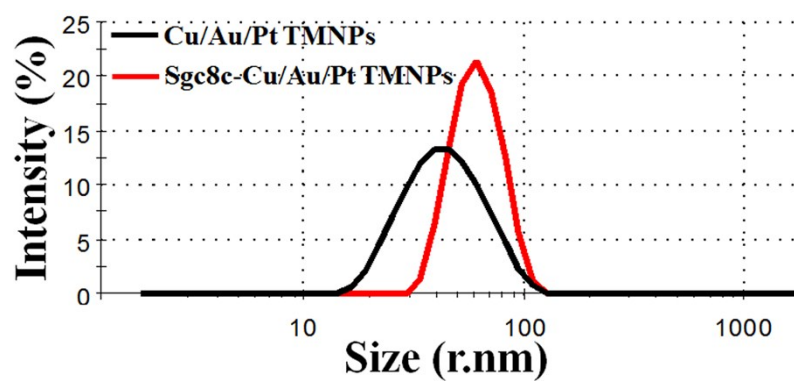

**Fig. S8** Hydrodynamic radius characterization of Cu/Au/Pt TMNPs and Sgc8c-Cu/Au/Pt TMNPs. The concrete values of Cu/Au/Pt TMNPs and Sgc8c-Cu/Au/Pt TMNPs were  $38.01 \pm 18.78$  nm and  $58.06 \pm 15.80$  nm, respectively.

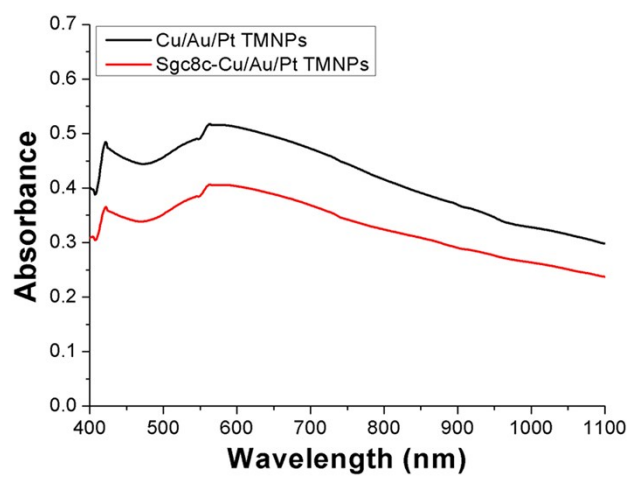

**Fig. S9** Absorption spectral characterization of Cu/Au/Pt TMNPs and Sgc8c-Cu/Au/Pt TMNPs.

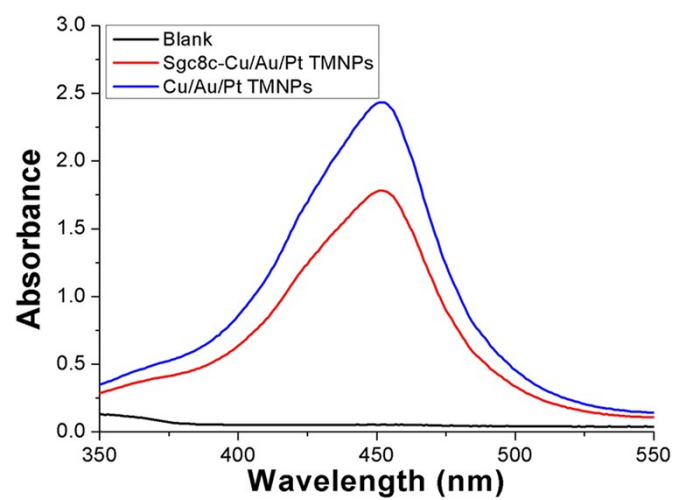

**Fig. S10** Catalytic activity characterization of Cu/Au/Pt TMNPs and Sgc8c-Cu/Au/Pt TMNPs on the TMB-H<sub>2</sub>O<sub>2</sub> reaction.

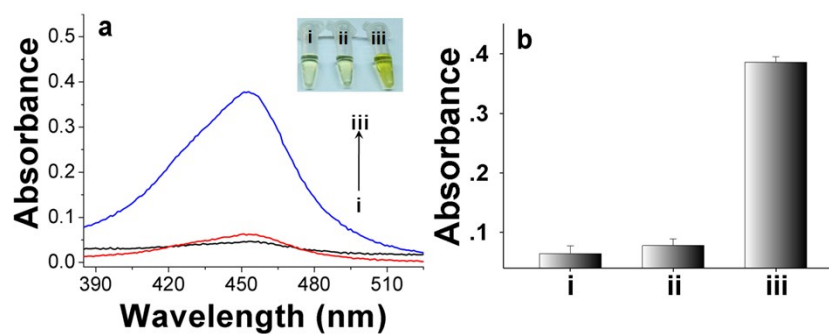

**Fig. S11** Feasibility analysis of the Sgc8c-Cu/Au/Pt TMNPs-based strategy for colorimetric detection of cancer cells. (a) Photographs and the characterization of background-subtracted absorption spectrum. (b) Histogram of the relevant background-subtracted absorbance at 450 nm in (a). (i) Lib-Cu/Au/Pt TMNPs incubated with CCRF-CEM cells; (ii) Sgc8c-Cu/Au/Pt TMNPs incubated with Ramos cells; (iii) Sgc8c-Cu/Au/Pt TMNPs incubated with CCRF-CEM cells. (Bar graph data are expressed as mean values  $\pm$  s.d.;  $n=3$ .).

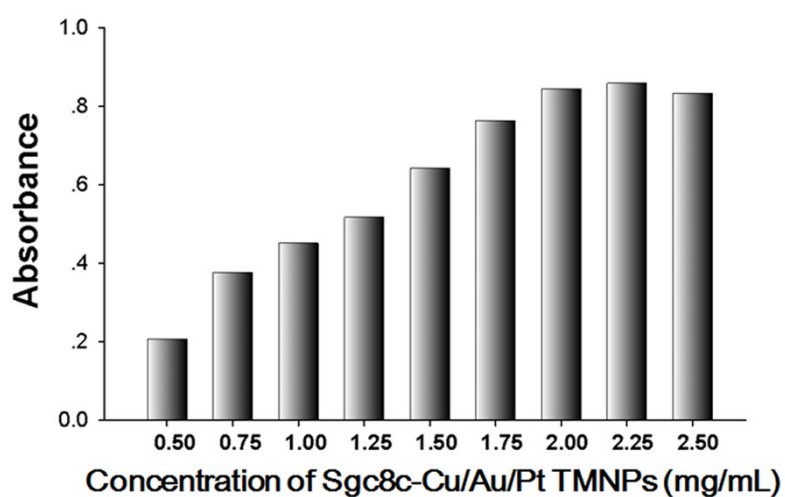

**Fig. S12** Optimization of the concentration of Sgc8c-Cu/Au/Pt TMNPs used for colorimetric analysis of target cells.



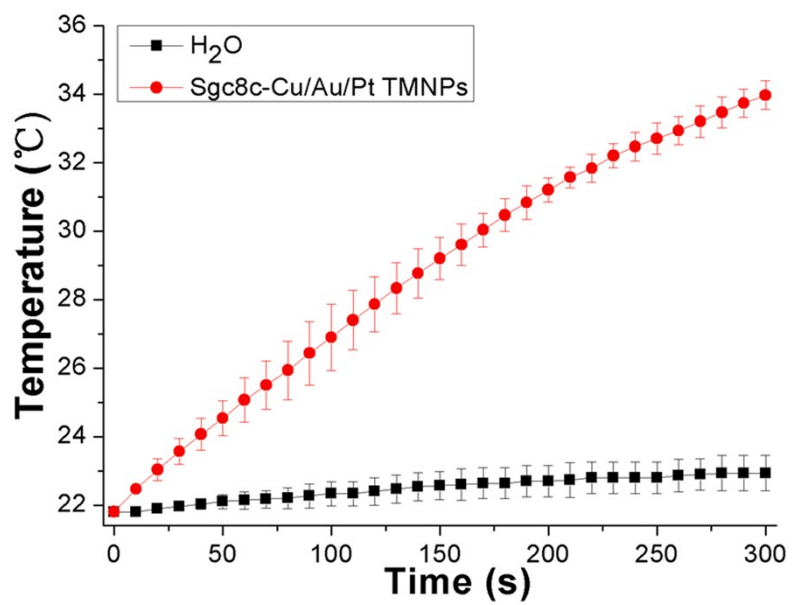

**Fig. S13** Heating curves of water and Sgc8c-Cu/Au/Pt TMNPs solution under 780 nm laser irradiation.

**Table S1** The comparison of different colorimetric methods for detection of glucose

| <b>Materials</b>                             | <b>Linear range</b> | <b>Detection limit</b> | <b>Reference</b> |
|----------------------------------------------|---------------------|------------------------|------------------|
| Cu/Au/Pt TMNPs                               | 0-0.2 mM            | 25 $\mu$ M             | This work        |
| Carbon dots                                  | 0.2-2.5 mM          | 60 $\mu$ M             | [1]              |
| Silver fabric                                | 0.1-2 mM            | 80 $\mu$ M             | [2]              |
| Multilayer paper                             | 0.02-4 mM           | 14 $\mu$ M             | [3]              |
| NiFe nanosheets                              | 0.05-2 mM           | 23 $\mu$ M             | [4]              |
| Brominated graphene                          | 40–100 mM,          | 28.41 mM               | [5]              |
| Graphene quantum dots                        | 0.025-0.375 mM      | 16 $\mu$ M             | [6]              |
| Fe <sub>3</sub> O <sub>4</sub> Nanoparticles | 0.05-1 mM           | 30 $\mu$ M             | [7]              |

## Reference

- [1] B. Wang, F. Liu, Y. Wu, Y. Chen, B. Weng and C. M. Li, *Sensor. Actuat. B-Chem.*, 2018, **255**, 2601-2607.
- [2] M. N. Karim, S. R. Anderson, S. Singh, R. Ramanathan and V. Bansal, *Biosens. Bioelectron.*, 2018, **110**, 8-15.
- [3] X. Wang, F. Li, Z. Cai, K. Liu, J. Li, B. Zhang and J. He, *Anal. Bioanal. Chem.*, 2018, **410**, 2647-2655.
- [4] T. Zhan, J. Kang, X. Li, L. Pan, G. Li and W. Hou, *Sensor. Actuat. B-Chem.*, 2018, **255**, 2635-2642.
- [5] S. Singh, K. Mitra, R. Singh, A. Kumari, S. K. S. Gupta, N. Misra, P. Maiti and B. Ray, *Anal. Methods*, 2017, **9**, 6675-6681.
- [6] L. Lin, X. Song, Y. Chen, M. Rong, T. Zhao, Y. Wang, Y. Jiang and X. Chen, *Anal. Chim. Acta*, 2015, **869**, 89-95.
- [7] H. Wei and E. Wang, *Anal. Chem.*, 2008, **80**, 2250-2254.
